# Supplementary material for: Long-Chain Acyl-CoA Synthetase is Associated with the Growth of Malassezia spp
Source: PubMed Central journal article supplement (PMC6958399; doi:10.3390/jof5040088), 2019-09-21
Supplement: jof-05-00088-s001.pdf [file jof-05-00088-s001.pdf]

**Table S1***Saccharomyces cerevisiae* strains used in this study.

| Strain          | Genotype                                                                                                     | Source of reference   |
|-----------------|--------------------------------------------------------------------------------------------------------------|-----------------------|
| IFO10150        | <i>MATa ste-VC9 ura3-52 trp1-289 his3-Δ1 leu2-3112 pTRS7</i>                                                 | (Tejima, et al. 2017) |
| SCFAA1-4        | <i>SCFAA1-4-Ura MATa ste-VC9 ura3-52 trp1-289 his3-Δ1 leu2-3112 Scfaa1Δ::dpl200 Scfaa4Δ::dpl200</i>          | (Tejima, et al. 2017) |
| SCFAA1-4-pTRS7  | <i>SCFAA1-4 MATa ste-VC9 ura3-52 trp1-289 his3-Δ1 leu2-3112 Scfaa1Δ::dpl200 Scfaa4Δ::dpl200 pTRS7</i>        | (Tejima, et al. 2017) |
| SCFAA1-4-ScFAA1 | <i>SCFAA1-4 MATa ste-VC9 ura3-52 trp1-289 his3-Δ1 leu2-3112 Scfaa1Δ::dpl200 Scfaa4Δ::dpl200 pTRS7-ScFAA1</i> | This study            |
| SCFAA1-4-ScFAA4 | <i>SCFAA1-4 MATa ste-VC9 ura3-52 trp1-289 his3-Δ1 leu2-3112 Scfaa1Δ::dpl200 Scfaa4Δ::dpl200 pTRS7-ScFAA4</i> | This study            |
| SCFAA1-4-MgFAA1 | <i>SCFAA1-4 MATa ste-VC9 ura3-52 trp1-289 his3-Δ1 leu2-3112 Scfaa1Δ::dpl200 Scfaa4Δ::dpl200 pTRS7-MgFAA1</i> | This study            |
| SCFAA1-4-MpFAA1 | <i>SCFAA1-4 MATa ste-VC9 ura3-52 trp1-289 his3-Δ1 leu2-3112 Scfaa1Δ::dpl200 Scfaa4Δ::dpl200 pTRS7-MpFAA1</i> | This study            |
| SCFAA1-4-MsFAA1 | <i>SCFAA1-4 MATa ste-VC9 ura3-52 trp1-289 his3-Δ1 leu2-3112 Scfaa1Δ::dpl200 Scfaa4Δ::dpl200 pTRS7-MsFAA1</i> | This study            |

\*IFO: Institution for Fermentation, Osaka, Japan

**Table S2**

Plasmids used in this study.

| Plasmid      | Description                                                                   | Source of reference |
|--------------|-------------------------------------------------------------------------------|---------------------|
| pTRS7        | <i>S. cerevisiae</i> cloning vector                                           | (Tejima, 2017)      |
| pTRS7-ScFAA1 | A plasmid for expression of <i>S. cerevisiae</i> <i>FAA1</i> into SCFAA1-4    | This study          |
| pTRS7-ScFAA4 | A plasmid for expression of <i>S. cerevisiae</i> <i>FAA4</i> into SCFAA1-4    | This study          |
| pTRS7-MpFAA1 | A plasmid for expression of <i>M. pachydermatis</i> <i>FAA1</i> into SCFAA1-4 | This study          |
| pTRS7-MgFAA1 | A plasmid for expression of <i>M. globosa</i> <i>FAA1</i> into SCFAA1-4       | This study          |
| pTRS7-MsFAA1 | A plasmid for expression of <i>M. sympodialis</i> <i>FAA1</i> into SCFAA1-4   | This study          |

**Table S3**

Primers used in this study.

Restriction endonuclease sites are underlined.

| Name             | Primer sequence (5'-3')              |
|------------------|--------------------------------------|
| ScFAA1-F         | TTGTCGACGTAAGTATAGAAAGTTCTTGTTGT     |
| ScFAA1-R         | TTGCGGCCGCGAAAAAGTGCTTTAGTATGATGAGGC |
| ScFAA4-F         | TTGGATCCCCCTCTGAGTTGACATAAAAAGCG     |
| ScFAA4-R         | TTGCGGCCGCGAGAAGAACTATGTATTGTGCAAGT  |
| MpFAA1-F         | TTGTCGACGAGAACGTAAGCAGGCAA           |
| MpFAA1-R         | TTCCCGGCCCGACGAACCACGCTAT            |
| MgFAA1-F         | TTGAATTCCTCTAATCGGCCTTCCGTT          |
| MgFAA1-R         | TTGGATCCACGCACGGATTGGCTATG           |
| MsFAA1-F         | TTCCCGGGAGCAGTCACGTTTTCAA            |
| MsFAA1-R         | TTACTAGTGGCCACGCCACACCGTAAT          |
| RT-PCR(MpFAA1-F) | AAGAAGGTAGGTGGCGAAGAGA               |
| RT-PCR(MpFAA1-R) | GCTCAAACCACTCGCAAAGA                 |
| RT-PCR(MpACT1-F) | CTTACGAACCAACCTGTGGTGA               |
| RT-PCR(MpACT1-R) | ACATTTCCGGCGTGTCTTGG                 |
